# Supplementary material for: Development of a spectrophotometric assay for high-throughput screening and mechanistic characterization of glucose-1-phosphate thymidylyltransferase inhibitors
Source: Royal Society of Chemistry journal article supplement (doi:10.1039/d6cb00002a), 2026-04-24
Supplement: d6cb00002a1.pdf [file d6cb00002a1.pdf]

**Supporting Information**  
**for**  
**Development of a Spectrophotometric Assay for**  
**High-Throughput Screening and Mechanistic**  
**Characterization of Glucose-1-Phosphate**  
**Thymidyltransferase Inhibitors**

*Bronwyn E. Rowland<sup>†</sup>, Jesse C. Fuller<sup>†</sup>, David L. Jakeman<sup>†‡\*</sup>*

<sup>†</sup> Department of Chemistry, Dalhousie University, Halifax, Nova Scotia, B3H 4R2, Canada.

<sup>‡</sup> College of Pharmacy, Dalhousie University, Halifax, Nova Scotia, B3H 4R2, Canada.

\* Author to whom correspondence should be addressed.

email: David.jakeman@dal.ca

TABLE OF CONTENTS

|                                                                                                                                              |   |
|----------------------------------------------------------------------------------------------------------------------------------------------|---|
| <b>Table S1.</b> Oligonucleotide primers used for site-directed mutagenesis. ....                                                            | 3 |
| <b>Figure S1.</b> Gel electrophoresis of wt Cps2L and the E253D variant.....                                                                 | 3 |
| <b>Figure S2.</b> Quantifying total phosphate concentration using the malachite green assay .....                                            | 4 |
| <b>Scheme S1.</b> Activation of $\alpha$ -PGM-by $\alpha$ -D-fructose-1-6-bisphosphate to generate $\alpha$ -D-glucose-1,6-bisphosphate..... | 4 |
| <b>Figure S3.</b> Representative progress curves for determining Cps2L kinetic parameters .....                                              | 5 |
| <b>Figure S4.</b> Representative TDP-Rha reactions in the absence of Cps2L.....                                                              | 5 |
| <b>Figure S5.</b> TDP-Rha binding at $\alpha$ -D-glucose-1-phosphate thymidyltransferase allosteric sites. 6                                 |   |
| <b>Figure S6.</b> Effect of $Mg^{2+}$ on <i>L. mesenteroides</i> G6PD .....                                                                  | 6 |
| <b>REFERENCES</b> .....                                                                                                                      | 7 |

**Table S1.** Oligonucleotide primers used for site-directed mutagenesis.

| Primer type | Oligonucleotide primer <sup>a</sup> | Translational change | T <sub>m</sub> (°C) |
|-------------|-------------------------------------|----------------------|---------------------|
| forward     | 5'-CAATTTGGAAGATATCGCCTATCG-3'      | E253D                | 60                  |
| reverse     | 5'-GCAACTTGAACGTTTTGCATG-3'         | N245N                | 59                  |

<sup>a</sup>The altered codons are underlined and the specific nucleotide substitutions are shown in boldface.

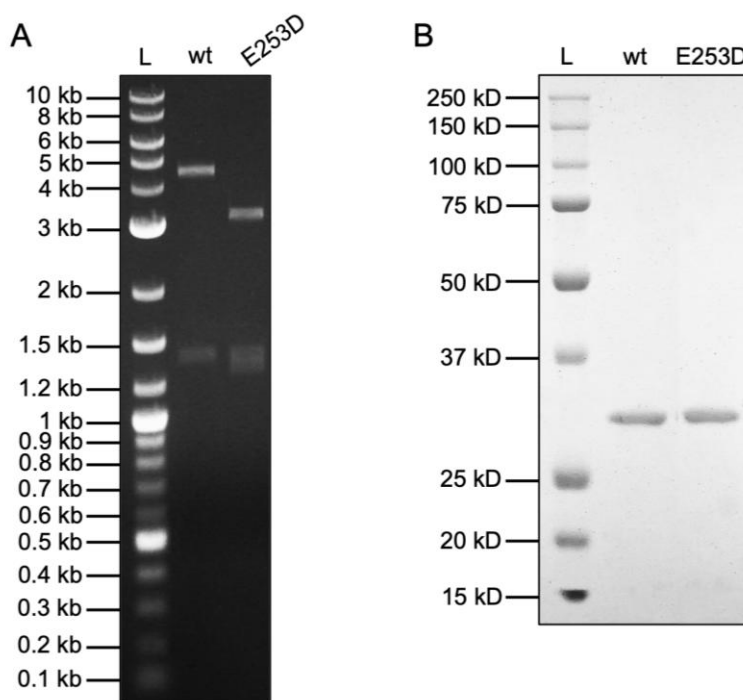

**Figure S1.** Gel electrophoresis of wt Cps2L and the E253D variant. (A) Plasmids bearing wt and E253D Cps2L variant sequences were digested with AclI and visualized by gel electrophoresis using a 1.2% agarose gel with RedSafe nucleic acid staining solution. Lane L is the DNA molecular weight ladder. Bands at 4427 kb, 1368 kb, and 396 kb (low resolution) reflect a non-mutated DNA sequence, as seen in the wt Cps2L lane. Bands at 3145 kb, 1368 kb, 1282 kb, and 396 kb (low resolution) reflect a mutated DNA sequence, as seen in the Cps2L E253D lane. (B) Purified wt Cps2L and Cps2L E253D protein were visualized by SDS-PAGE using a 4% acrylamide stacking gel and a 12.5% acrylamide resolving gel, stained with Coomassie Brilliant Blue G-250. Lane L is the protein molecular weight ladder. The expected molecular weight for both proteins is approximately 34.4 kDa.

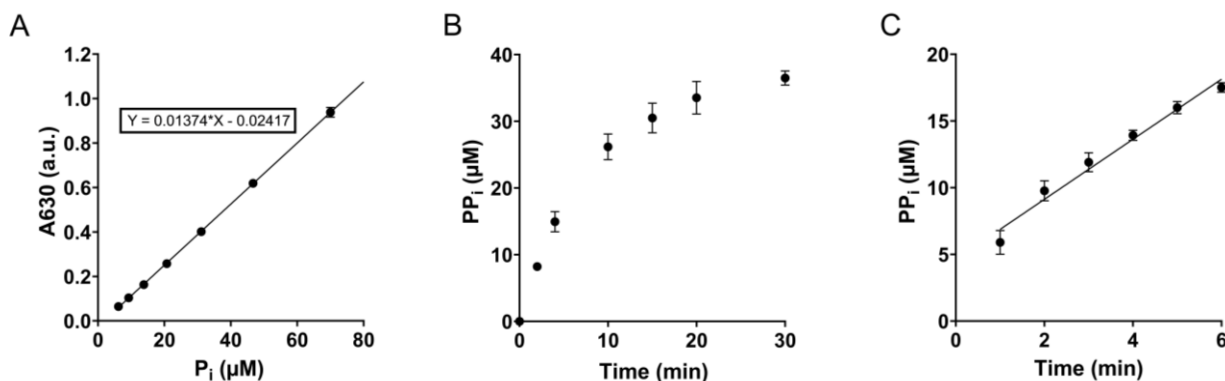

**Figure S2.** Quantifying total phosphate concentration using the malachite green assay. (A) Representative monophosphate standard curve. Two 1.5-fold serial dilutions of  $P_i$  (70  $\mu\text{M}$  to 6.15  $\mu\text{M}$ ) were prepared in assay buffer. Absorbance at 630 nm was measured, normalized to a buffer control (0  $\mu\text{M}$   $P_i$ ), averaged across replicates, and then fit by linear regression. Data shown are mean  $\pm$  SD ( $n=2$ ), although error bars are smaller than the data points. (B) Cps2L activity over time, monitored by the production of  $PP_i$  over 30 minutes, quantified using the monophosphate standard curve.  $PP_i$  production is equimolar to TDP-Glc production. (C) Linear product formation was observed between 1-6 min. Reactions contained 10 nM Cps2L, 100  $\mu\text{M}$  TTP, 100  $\mu\text{M}$  G-1-P, 5 mM  $\text{MgCl}_2$ , and 0.8 EU/mL IPP, and were quenched with 0.1% formic acid. Data shown are mean  $\pm$  SD ( $n=2$ ).

**Scheme S1.** Activation of  $\alpha$ -PGM-by  $\alpha$ -D-fructose-1-6-bisphosphate to generate  $\alpha$ -D-glucose-1,6-bisphosphate.<sup>a</sup>

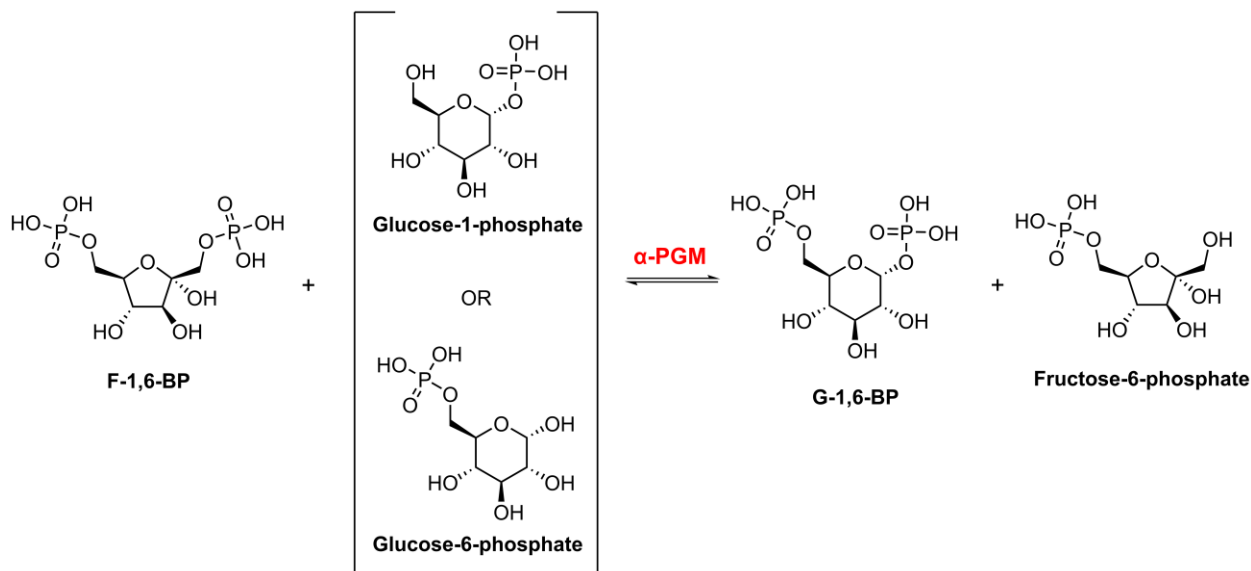

<sup>a</sup> $\alpha$ -D-fructose-1-6-bisphosphate (F-1,6-BP) phosphorylates the  $\alpha$ -PGM catalytic serine. This phosphoryl group is enzymatically transferred to  $\alpha$ -D-glucose-6-phosphate or  $\alpha$ -D-glucose-1-phosphate to produce  $\alpha$ -D-glucose-1,6-bisphosphate (G-1,6-BP).<sup>1</sup>

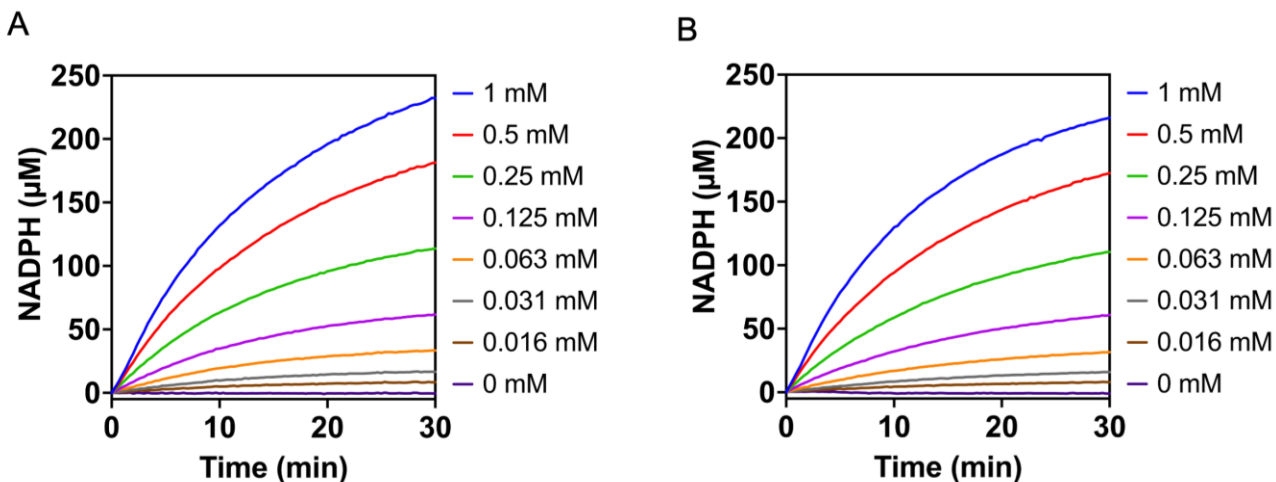

**Figure S3.** Representative progress curves for determining Cps2L kinetic parameters. (A) Cps2L activity was measured across a 2-fold serial dilution of UDP-Glc using the developed NADPH-coupled assay (0.5 mM PP<sub>i</sub>, 1 mM NADP<sup>+</sup>, 100  $\mu\text{M}$  F-1,6-BP, 5 mM MgCl<sub>2</sub>, 1.5 EU/mL PGM, 1.5 EU/mL G6PD, and 25 nM Cps2L, monitored at 340 nm). Activity was also measured in the absence of UDP-Glc, but this  $v_i$  was not used to fit the Michaelis-Menten plot. (B) Cps2L activity was measured across a 2-fold serial dilution of PP<sub>i</sub> using the developed NADPH-coupled assay (0.5 mM UDP-Glc, 1 mM NADP<sup>+</sup>, 100  $\mu\text{M}$  F-1,6-BP, 5 mM MgCl<sub>2</sub>, 1.5 EU/mL PGM, 1.5 EU/mL G6PD, and 25 nM Cps2L, monitored at 340 nm). Activity was also measured in the absence of PP<sub>i</sub>, but this  $v_i$  was not used to fit the Michaelis-Menten plot.

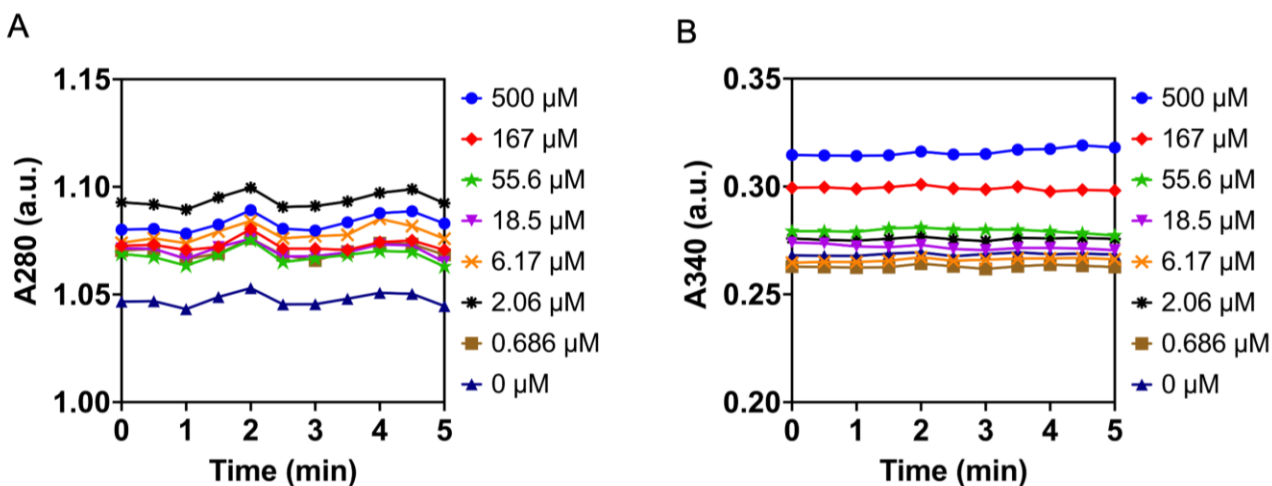

**Figure S4.** Representative TDP-Rha reactions in the absence of Cps2L. The absorbance of reaction mixtures containing all components of the NADPH-coupled assay (300  $\mu\text{M}$  UDP-Glc, 100  $\mu\text{M}$  PP<sub>i</sub>, 500  $\mu\text{M}$  NADP<sup>+</sup>, 100  $\mu\text{M}$  F-1,6-BP, 8 mM MgCl<sub>2</sub>, 1.5 EU/mL PGM, 1.5 EU/mL G6PD) except Cps2L were measured at (A) 280 nm and (B) 340 nm across a 3-fold serial dilution of TDP-Rha. No meaningful change in absorbance was measured over time at either wavelength (photometric accuracy for microplates in the SpectraMax Plus 384 UV/Vis microplate reader is  $\pm 0.006 \text{ OD} \pm 1.0\%$  from 0-2 OD).<sup>2</sup>

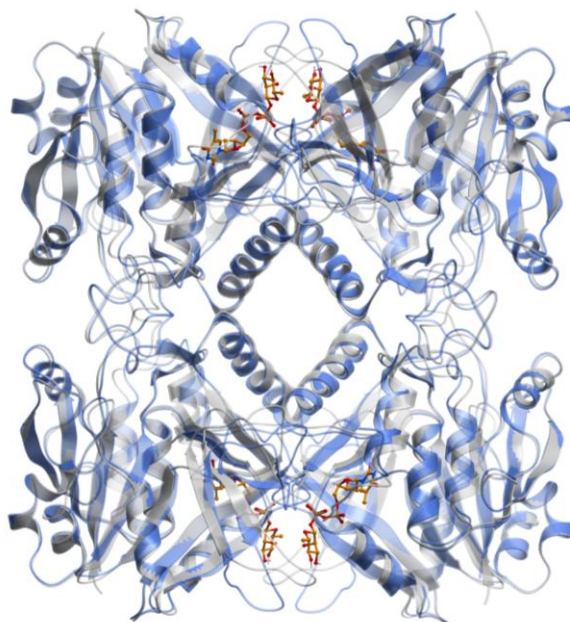

**Figure S5.** TDP-Rha binding at  $\alpha$ -D-glucose-1-phosphate thymidyltransferase allosteric sites. The tertiary structure of *S. pneumoniae* Cps2L was predicted using AlphaFold3 (blue) and aligned to the crystal structure of *P. aeruginosa* RmlA (grey, PDB: 1G3L).<sup>3</sup> The homologs share a common fold and have high sequence similarity (68%). TDP-Rha molecules located in the *P. aeruginosa* RmlA allosteric sites are shown in yellow.

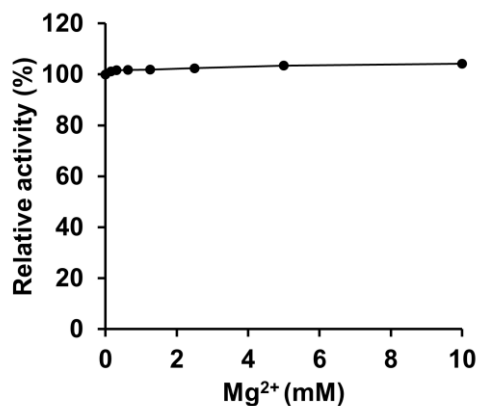

**Figure S6.** Effect of Mg<sup>2+</sup> on *L. mesenteroides* G6PD. Relative activity represents the percent ratio of each measured  $v_i$  to that of the maximum observed  $v_i$  in the dataset. Reactions contained 0.01 EU/mL G6PD, 100  $\mu$ M NADP<sup>+</sup>, 500  $\mu$ M G6P, and 0-10 mM Mg<sup>2+</sup> in 40 mM MOPS buffer. G6PD activity was minimally affected by Mg<sup>2+</sup> concentration.

## REFERENCES

- 1 J. V. Passonneau, O. H. Lowry, D. W. Schulz and J. G. Brown, *J. Biol. Chem.*, 1969, **244**, 902–909.
- 2 SpectraMax Plus 384 Microplate Reader,  
<https://www.moleculardevices.com/sites/default/files/en/assets/data-sheets/br/spectramax-plus-384-microplate-reader.pdf>.
- 3 W. Blankenfeldt, M. Asuncion, J. S. Lam and J. H. Naismith, *EMBO J.*, 2000, **19**, 6652–6663.
